# Supplementary material for: Prognostic Value of a Novel and Established High-Sensitivity Troponin I Assay in Patients Presenting with Suspected Myocardial Infarction
Source: PubMed Central journal article supplement (PMC6769518; doi:10.3390/biom9090469), 2019-09-09
Supplement: biomolecules-09-00469-s001.pdf [file biomolecules-09-00469-s001.pdf]

# Online Supplement: Prognostic Value of a Novel and an Established High-Sensitivity Troponin I Assay in Patients presenting with Suspected Myocardial Infarction

Nils A. Sørensen <sup>1,2,\*,†</sup>, Sebastian Ludwig <sup>1,2,\*,†</sup>, Nataliya Makarova <sup>1,2</sup>, Johannes T. Neumann <sup>1,2</sup>, Jonas Lehmacher <sup>1</sup>, Tau S. Hartikainen <sup>1</sup>, Paul M. Haller <sup>1,2</sup>, Till Keller <sup>3,4</sup>, Stefan Blankenberg <sup>1,2</sup>, Dirk Westermann <sup>1,2</sup>, Tanja Zeller <sup>1,2,‡</sup> and Niklas Schofer <sup>1,‡</sup>

<sup>1</sup> Department of General and Interventional Cardiology, University Heart Center, Martinistrasse 52, 20246 Hamburg, Germany

<sup>2</sup> German Center for Cardiovascular Research (DZHK), Partner Site Hamburg/Kiel/Lübeck, Martinistrasse 52, 20246 Hamburg, Germany

<sup>3</sup> Kerckhoff Heart and Thorax Center, Department of Cardiology, Benekestrasse 2–8, 61231 Bad Nauheim, Germany

<sup>4</sup> German Center for Cardiovascular Research (DZHK), Partner Site RheinMain, Benekestrasse 2–8, 61231 Bad Nauheim, Germany

\* Correspondence: n.soerensen@uke.de (N.A.S.); se.ludwig@uke.de (S.L.); Tel.: +49-40-7410-59658 (N.A.S.); Fax: +49-40-7410-56599 (N.A.S.)

† Both authors contributed equally as first authors.

‡ Both authors contributed equally as last authors.

## Comparison between high-sensitivity troponin I assays

Both assays (Method A: Abbott, Method B: Singulex) were compared using Passing-Bablok (**Figure S3A–C**) and Bland-Altman (**Figure S4A–C**) regression. Regression analysis was performed for the overall patient cohort (**Figures S3 and S4A**) as well as for the subgroups of AMI patients (**Figures S3 and S4B**) and non-AMI patients (**Figures S3 and S4C**). Bias between both methods was 0.7844 (standard deviation (SE): 0.5710) for the overall patient cohort, 0.7325 (SE: 0.5710) for the subgroup of AMI patients and 0.7993 (SE: 0.5710) for the subgroup of non-AMI patients.

**Table 1.** Patient characteristics according to thirds of troponin levels analyzed by both assays.

|                                       | 1st Third Singulex<br>(N = 780) | 1st Third Abbott<br>(N = 780) | 2nd Third Singulex<br>(N = 775) | 2nd Third Abbott<br>(N = 776) | 3rd Third Singulex (N = 777) | 3rd Third Abbott<br>(N = 776) |
|---------------------------------------|---------------------------------|-------------------------------|---------------------------------|-------------------------------|------------------------------|-------------------------------|
| Age (years)                           | 53.0 (43.0, 63.6)               | 54.0 (44.4, 66.0)             | 69.0 (59.0, 76.0)               | 68.0 (55.0, 76.0)             | 69.0 (57.0, 76.0)            | 69.0 (57.0, 77.0)             |
| Sex (male) No. (%)                    | 435 (55.8)                      | 436 (55.9)                    | 518 (66.8)                      | 520 (67.0)                    | 555 (71.4)                   | 552 (71.1)                    |
| Current smoker No. (%)                | 228 (29.4)                      | 214 (27.5)                    | 136 (17.6)                      | 159 (20.6)                    | 203 (26.4)                   | 194 (25.2)                    |
| Diabetes No. (%)                      | 62 (8.1)                        | 61 (7.9)                      | 126 (16.4)                      | 127 (16.6)                    | 146 (19.0)                   | 146 (19.0)                    |
| BMI (kg/m <sup>2</sup> )              | 25.8 (23.3, 28.9)               | 25.9 (23.2, 29.0)             | 27.0 (24.4, 30.7)               | 26.9 (24.5, 30.2)             | 26.8 (24.2, 30.1)            | 26.8 (24.2, 30.4)             |
| HTN No. (%)                           | 372 (47.8)                      | 406 (52.1)                    | 627 (81.2)                      | 595 (77.0)                    | 611 (78.7)                   | 609 (78.6)                    |
| HLP No. (%)                           | 273 (35.0)                      | 289 (37.1)                    | 401 (51.7)                      | 394 (50.8)                    | 455 (58.6)                   | 446 (57.5)                    |
| History of AMI No. (%)                | 46 (5.9)                        | 53 (6.8)                      | 164 (21.2)                      | 156 (20.2)                    | 202 (26.1)                   | 203 (26.3)                    |
| History of CAD No. (%)                | 121 (15.6)                      | 136 (17.6)                    | 324 (42.0)                      | 314 (40.7)                    | 346 (44.5)                   | 341 (43.9)                    |
| Family history of CAD No. (%)         | 205 (26.9)                      | 205 (26.9)                    | 159 (21.3)                      | 162 (21.5)                    | 157 (20.9)                   | 154 (20.6)                    |
| AF No. (%)                            | 58 (7.5)                        | 69 (8.9)                      | 158 (20.5)                      | 144 (18.7)                    | 166 (21.5)                   | 169 (21.9)                    |
| HF No. (%)                            | 17 (2.2)                        | 14 (1.8)                      | 72 (9.3)                        | 80 (10.4)                     | 128 (16.6)                   | 123 (16.0)                    |
| eGFR (mL/min for 1.73m <sup>2</sup> ) | 87.9 (75.6, 100.1)              | 86.9 (74.1, 99.0)             | 73.4 (59.5, 86.7)               | 74.9 (60.5, 87.7)             | 69.4 (52.0, 85.8)            | 69.3 (52.3, 86.0)             |
| GRACE > 140 No. (%)                   | 6 (0.8)                         | 4 (0.5)                       | 80 (10.6)                       | 82 (10.8)                     | 159 (21.4)                   | 159 (21.5)                    |
| Troponin I (ng/L)                     | 0.7 (0.5, 1.0)*                 | 2.3 (1.8, 3.2)+               | 2.3 (1.8, 3.4)*                 | 6.8 (5.3, 9.7)+               | 32.8 (10.4, 282.4)*          | 81.8 (25.4, 552.9)+           |
| Final Diagnosis of AMI                | 6 (0.8)                         | 11 (1.4)                      | 59 (7.6)                        | 61 (7.9)                      | 453 (58.3)                   | 446 (57.5)                    |

Baseline characteristics of patients divided by thirds of troponin levels according to both assays are presented as absolute and relative frequencies for categorical variables and quartiles for continuous variables. \* indicates levels analyzed by Singulex, + indicates levels analyzed by Abbott. AMI stands for acute myocardial infarction. eGFR stands for estimated Glomerular Filtration Rate. GRACE stands for Global Registry of Acute Coronary Events.

**Table 2.** Patient characteristics of patients with the final diagnosis of AMI according to thirds of troponin levels analyzed by both assays.

|                                       | 1st Third Singulex<br>(N = 780) | 1st Third Abbott<br>(N = 780) | 2nd Third Singulex<br>(N = 775) | 2nd Third Abbott<br>(N = 776) | 3rd Third Singulex<br>(N = 777) | 3rd Third Abbott<br>(N = 776) |
|---------------------------------------|---------------------------------|-------------------------------|---------------------------------|-------------------------------|---------------------------------|-------------------------------|
| Age (years)                           | 68.0 (58.0, 75.3)               | 68.0 (58.0, 75.3)             | 67.5 (58.0, 75.6)               | 68.0 (58.0, 75.0)             | 68.0 (56.7, 75.0)               | 68.0 (57.0, 75.3)             |
| Sex (male) No. (%)                    | 118 (68.2)                      | 119 (68.8)                    | 124 (72.1)                      | 123 (71.5)                    | 126 (72.8)                      | 126 (72.8)                    |
| Current smoker No. (%)                | 49 (28.3)                       | 50 (28.9)                     | 48 (28.2)                       | 50 (29.2)                     | 64 (37.0)                       | 61 (35.5)                     |
| Diabetes No. (%)                      | 32 (18.7)                       | 33 (19.3)                     | 40 (23.5)                       | 41 (24.1)                     | 23 (13.4)                       | 21 (12.2)                     |
| BMI (kg/m <sup>2</sup> )              | 26.8 (23.6, 29.8)               | 26.9 (23.5, 29.9)             | 27.5 (24.5, 30.1)               | 27.3 (24.7, 30.2)             | 26.2 (24.0, 29.0)               | 26.1 (23.9, 28.9)             |
| HTN No. (%)                           | 137 (79.7)                      | 135 (78.5)                    | 135 (78.5)                      | 136 (79.1)                    | 125 (72.3)                      | 126 (72.8)                    |
| HLP No. (%)                           | 82 (47.4)                       | 82 (47.4)                     | 103 (59.9)                      | 107 (62.2)                    | 102 (59.0)                      | 98 (56.6)                     |
| History of AMI No. (%)                | 37 (21.4)                       | 35 (20.2)                     | 41 (23.8)                       | 44 (25.7)                     | 34 (19.9)                       | 33 (19.2)                     |
| History of CAD No. (%)                | 68 (39.3)                       | 66 (38.2)                     | 71 (41.3)                       | 75 (43.6)                     | 61 (35.3)                       | 59 (34.1)                     |
| Family history of CAD No. (%)         | 31 (18.5)                       | 32 (19.0)                     | 40 (24.0)                       | 39 (23.5)                     | 39 (23.8)                       | 39 (23.6)                     |
| AF No. (%)                            | 37 (21.5)                       | 35 (20.3)                     | 26 (15.3)                       | 28 (16.5)                     | 18 (10.4)                       | 18 (10.4)                     |
| HF No. (%)                            | 24 (13.9)                       | 21 (12.1)                     | 19 (11.1)                       | 19 (11.2)                     | 21 (12.3)                       | 24 (14.0)                     |
| eGFR (mL/min for 1.73m <sup>2</sup> ) | 69.2 (55.3, 83.3)               | 70.0 (56.9, 83.6)             | 69.5 (53.9, 84.4)               | 67.5 (51.5, 83.7)             | 72.0 (56.0, 89.4)               | 72.8 (55.0, 89.3)             |
| GRACE > 140 No. (%)                   | 39 (23.4)                       | 36 (21.7)                     | 31 (18.6)                       | 31 (18.5)                     | 26 (16.0)                       | 29 (17.8)                     |
| Troponin I (ng/L)                     | 8.0 (3.6, 13.9) *               | 16.9 (8.8, 26.8) +            | 88.3 (48.2, 175.2) *            | 182.8 (103.2, 329.0) +        | 1401.5 (612.6, 4041.3) *        | 3207.4 (1381.9, 10392.6) +    |

Baseline characteristics of patients with a final diagnosis of AMI divided by thirds of troponin levels according to both assays are presented as absolute and relative frequencies for categorical variables and quartiles for continuous variables. \* indicates levels analyzed by Singulex, + indicates levels analyzed by Abbott. AMI stands for acute myocardial infarction. eGFR stands for estimated Glomerular Filtration Rate. GRACE stands for Global Registry of Acute Coronary Events.

**Table 3.** Patient characteristics of patients with the final diagnosis of non-AMI according to thirds of troponin levels analyzed by both assays.

|                                       | <b>1st Third Singulex<br/>(N = 780)</b> | <b>1st Third Abbott<br/>(N = 780)</b> | <b>2nd Third Singulex<br/>(N = 775)</b> | <b>2nd Third Abbott<br/>(N = 776)</b> | <b>3rd Third Singulex<br/>(N = 777)</b> | <b>3rd Third Abbott<br/>(N = 776)</b> |
|---------------------------------------|-----------------------------------------|---------------------------------------|-----------------------------------------|---------------------------------------|-----------------------------------------|---------------------------------------|
| Age (years)                           | 50.0 (42.0, 60.0)                       | 53.0 (43.0, 63.8)                     | 66.0 (55.0, 74.0)                       | 66.0 (52.0, 74.0)                     | 70.0 (59.0, 77.0)                       | 70.0 (58.0, 77.6)                     |
| Sex (male) No. (%)                    | 323 (53.2)                              | 324 (53.0)                            | 394 (65.3)                              | 394 (65.8)                            | 423 (70.0)                              | 422 (69.9)                            |
| Current smoker No. (%)                | 189 (31.2)                              | 175 (28.7)                            | 113 (18.9)                              | 115 (19.4)                            | 104 (17.4)                              | 116 (19.4)                            |
| Diabetes No. (%)                      | 40 (6.7)                                | 45 (7.5)                              | 79 (13.2)                               | 82 (13.8)                             | 120 (20.2)                              | 112 (18.8)                            |
| BMI (kg/m <sup>2</sup> )              | 25.4 (22.9, 28.7)                       | 25.7 (23.1, 28.8)                     | 27.1 (24.6, 30.4)                       | 26.8 (24.4, 30.1)                     | 26.8 (24.5, 30.7)                       | 26.8 (24.5, 30.7)                     |
| HTN No. (%)                           | 262 (43.2)                              | 302 (49.5)                            | 449 (74.8)                              | 418 (70.1)                            | 502 (83.1)                              | 493 (81.6)                            |
| HLP No. (%)                           | 194 (32.0)                              | 212 (34.7)                            | 294 (48.8)                              | 291 (48.6)                            | 354 (58.6)                              | 339 (56.1)                            |
| History of AMI No. (%)                | 25 (4.1)                                | 31 (5.1)                              | 94 (15.7)                               | 97 (16.3)                             | 181 (30.1)                              | 172 (28.5)                            |
| History of CAD No. (%)                | 73 (12.1)                               | 96 (15.8)                             | 200 (33.4)                              | 198 (33.3)                            | 318 (52.7)                              | 297 (49.3)                            |
| Family history of CAD No. (%)         | 167 (28.0)                              | 162 (27.2)                            | 134 (23.0)                              | 137 (23.5)                            | 110 (18.9)                              | 112 (19.2)                            |
| AF No. (%)                            | 34 (5.6)                                | 51 (8.4)                              | 92 (15.3)                               | 87 (14.7)                             | 175 (29.2)                              | 163 (27.1)                            |
| HF No. (%)                            | 11 (1.8)                                | 12 (2.0)                              | 33 (5.5)                                | 31 (5.2)                              | 109 (18.2)                              | 110 (18.3)                            |
| eGFR (mL/min for 1.73m <sup>2</sup> ) | 89.8 (77.8, 102.0)                      | 88.0 (75.7, 100.3)                    | 78.2 (64.1, 89.2)                       | 78.5 (64.9, 90.8)                     | 68.3 (50.8, 84.4)                       | 70.1 (51.8, 86.2)                     |
| GRACE > 140 No. (%)                   | 1 (0.2)                                 | 3 (0.5)                               | 29 (4.9)                                | 30 (5.2)                              | 119 (20.6)                              | 116 (20.0)                            |
| Troponin I (ng/L)                     | 0.6 (0.5, 0.8)*                         | 1.9 (1.8, 2.6) <sup>+</sup>           | 1.6 (1.3, 2.1)*                         | 5.0 (4.1, 6.1) <sup>+</sup>           | 5.8 (3.8, 11.8)*                        | 15.2 (10.6, 32.8) <sup>+</sup>        |

Baseline characteristics of patients with a final diagnosis of non-AMI divided by thirds of troponin levels according to both assays are presented as absolute and relative frequencies for categorical variables and quartiles for continuous variables. \* indicates levels analyzed by Singulex, <sup>+</sup> indicates levels analyzed by Abbott. AMI stands for acute myocardial infarction. eGFR stands for estimated Glomerular Filtration Rate. GRACE stands for Global Registry of Acute Coronary Events.

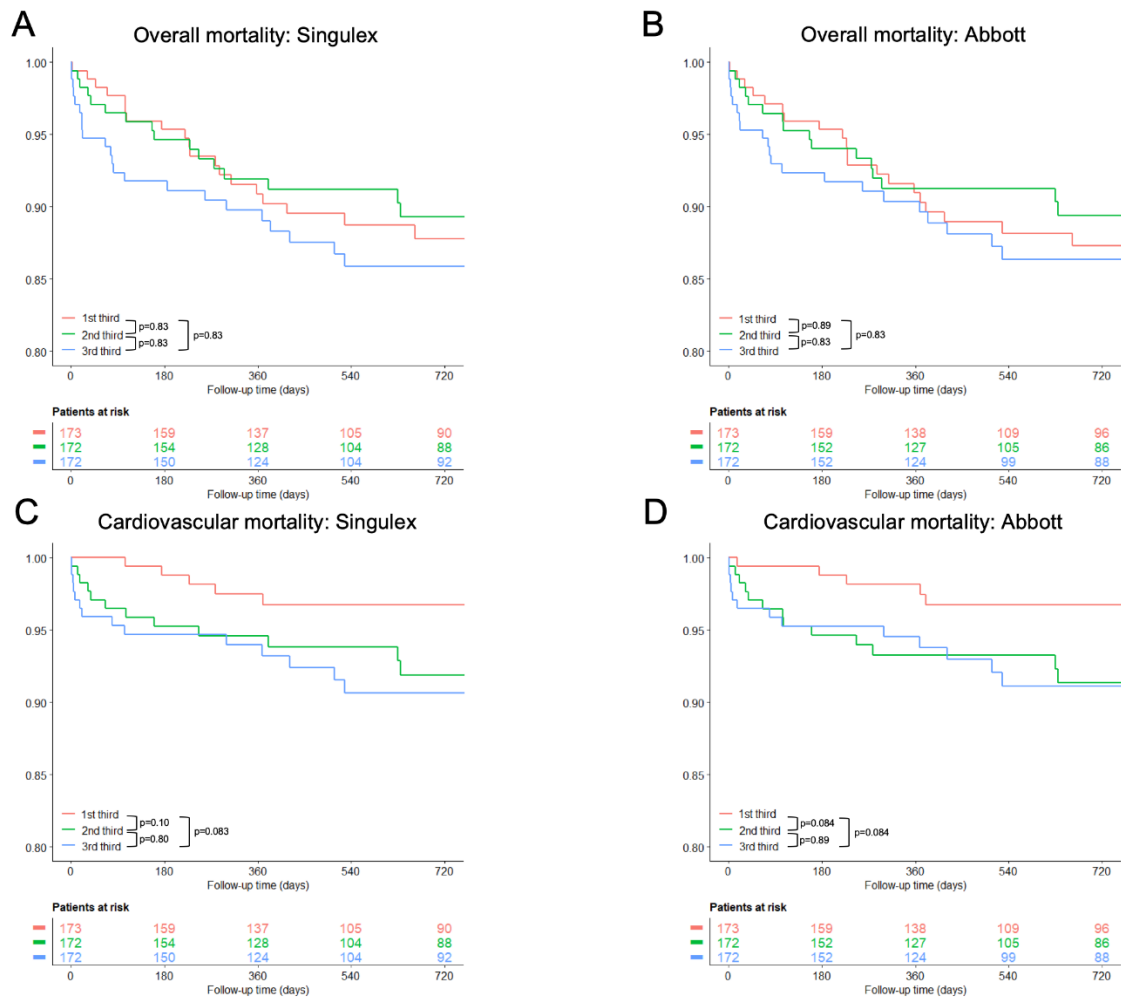

**Figure 1.** Survival analysis according to thirds of troponin levels in patients with AMI. Kaplan–Meier curves according thirds for the endpoints overall (A+B) and cardiovascular mortality (C+D) in patients with adjudicated diagnosis of AMI. P stands for p-value of the log-rank test.

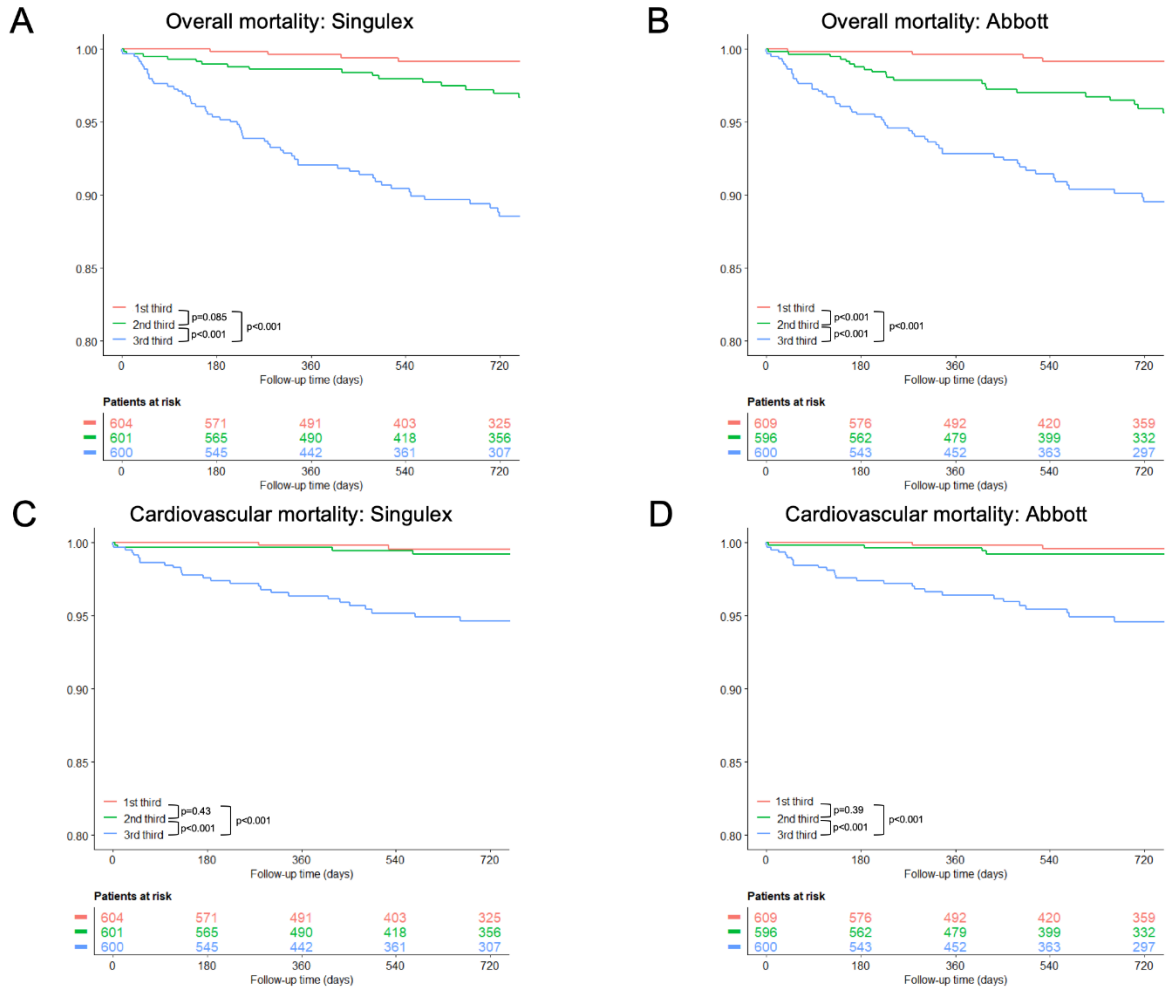

**Figure 2.** Survival analysis according to thirds of troponin levels in patients without AMI. Kaplan-Meier curves according thirds for the endpoints overall (A+B) and cardiovascular mortality (C+D) in patients with adjudicated diagnosis of non-AMI. P stands for p-value of the log-rank test.

**A**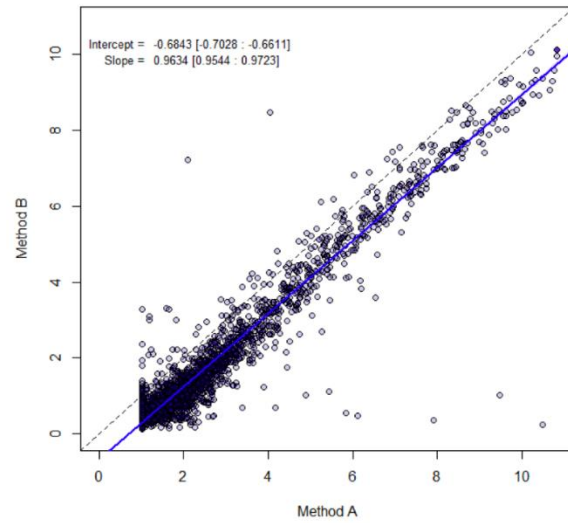**B**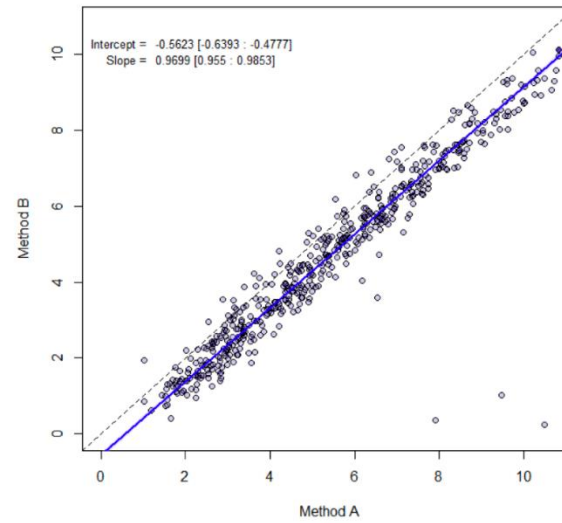**C**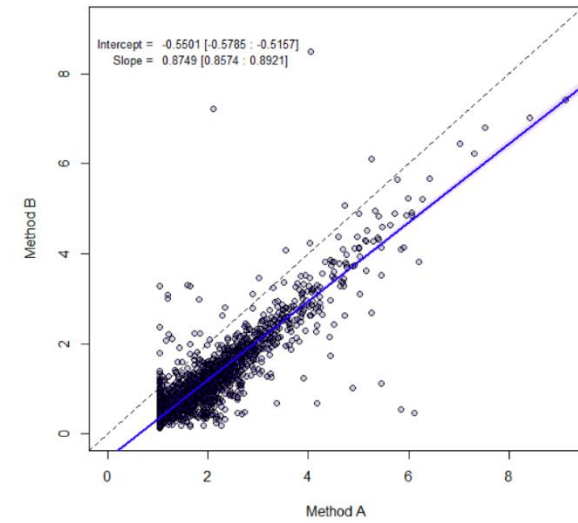

**Figure 3.** Correlation of both hs-TnI assays.

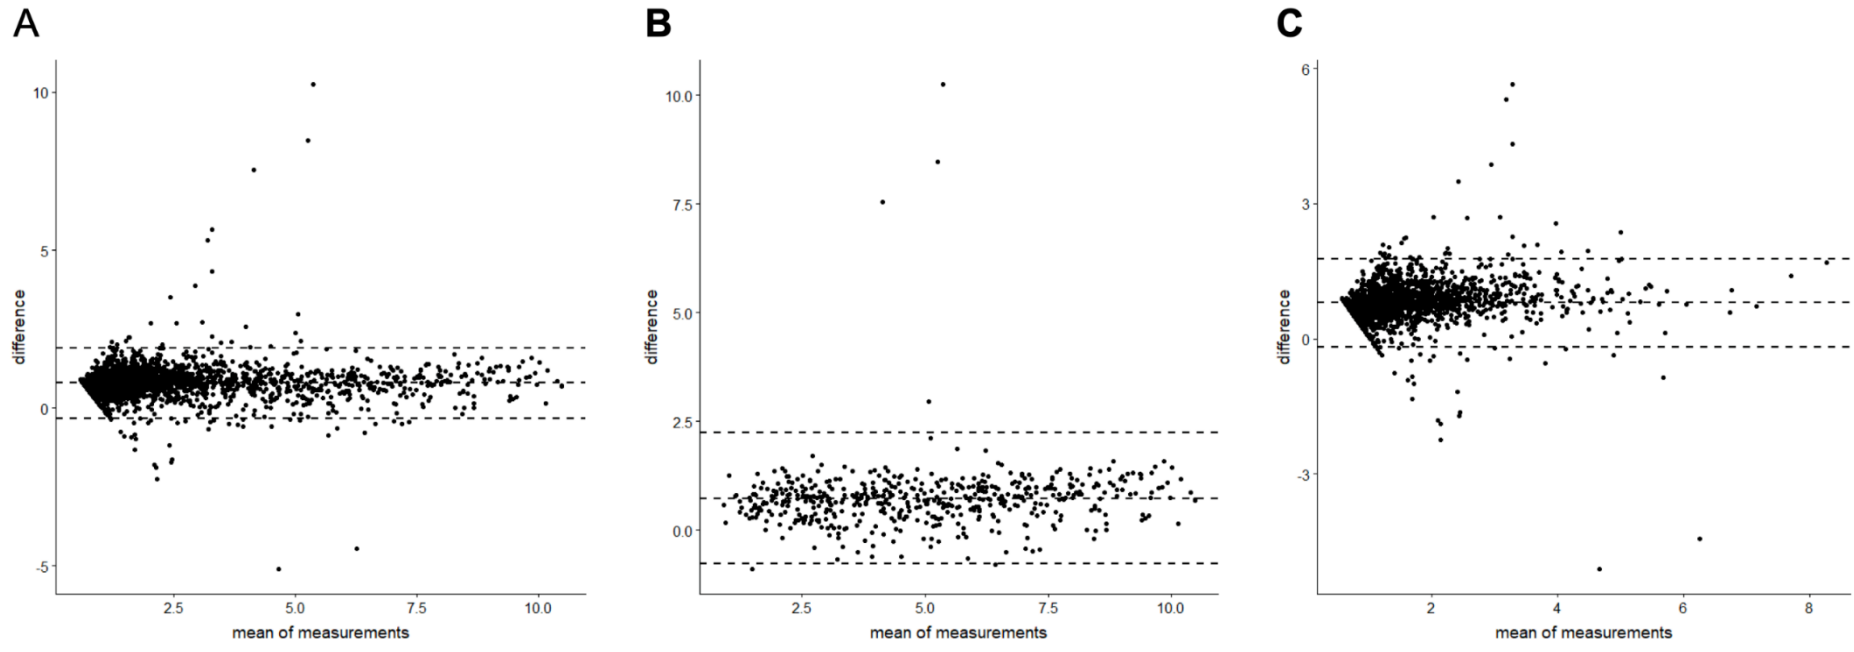

**Figure 4.** Bland-Altman analysis for comparison of both hs-TnI assays.
